# Supplementary material for: Transcription factor networks involved in cell death in the dorsal root ganglia following peripheral nerve injury
Source: PubMed Central journal article supplement — Neural Regen Res. 2018 Sep;13(9):1622–7. doi: 10.4103/1673-5374.237183 (PMC6126133; doi:10.4103/1673-5374.237183), 2018-09
Supplement: NRR-13-1622_Suppl2.pdf [file NRR-13-1622_Suppl2.pdf]

**Additional Table 2 The enriched Molecular and Cellular Functions of differentially expressed TFs by Z-score**

| Molecular and Cellular Functions      | 3h       | 9h       | 1d       | 4d       | 7d       |
|---------------------------------------|----------|----------|----------|----------|----------|
| Binding of DNA                        | -0.8919  | -0.39172 | -0.87704 | -0.70658 | -1.54412 |
| Transactivation of RNA                | -1.23746 | 0.163207 | -0.06698 | -0.97119 | -0.09465 |
| Cell death                            | -0.86313 | 0        | -1.18547 | -0.89916 | 0.01185  |
| Proliferation of leukemia cell line   | 0        | 0        | -1.21854 | -1.40556 | -0.27052 |
| Maturation of cells                   | 0        | N/A      | -0.65094 | -1.04707 | -1.04707 |
| Colony formation                      | 0        | 0        | 0        | -1.29088 | -0.62604 |
| Binding of protein binding site       | 0        | N/A      | 1.229323 | 0.653263 | -0.28545 |
| Apoptosis of fibroblast cell lines    | 0        | 1.292108 | 0.63454  | 0        | 0        |
| Cell viability                        | -0.90037 | 0.444118 | 1.282108 | 1.237046 | 1.783    |
| Cell survival                         | 0        | 0        | 1.670613 | 1.322267 | 1.638719 |
| Differentiation of nervous system     | 0        | N/A      | 1.981735 | 0.997509 | 1.297075 |
| Apoptosis of leukemia cell lines      | 0        | 0        | 1.970838 | 1.178047 | 0.98675  |
| Expansion of blood cells              | 0        | 0        | 0        | 0        | 2.173097 |
| Pluripotency of cells                 | 0        | 0        | 0        | 0        | 1.127969 |
| Expansion of cells                    | 0        | 0        | 0        | 0.392232 | 1.616155 |
| Differentiation of stem cells         | 0        | 0.074883 | 0.773792 | 0.730297 | 1.14961  |
| Quantity of steroid                   | 0        | 0        | 0.534522 | 1.261074 | 1.85371  |
| Production of cells                   | 0        | 0        | N/A      | 1.226833 | 2.030878 |
| Differentiation of neuroblastoma      | 0        | 0        | 0        | 1.982481 | N/A      |
| Cell death of leukemia cell lines     | 0        | 0        | 0        | 1.278454 | 1.235364 |
| Differentiation of leukemia cell line | N/A      | 0        | 0        | 1.445998 | 0.69192  |
